# Supplementary material
Source: PubMed Central journal article supplement (PMC3790049)
Supplement: embor2013106s1.pdf [file embor2013106s1.pdf]

**SUPPLEMENTARY INFORMATION**

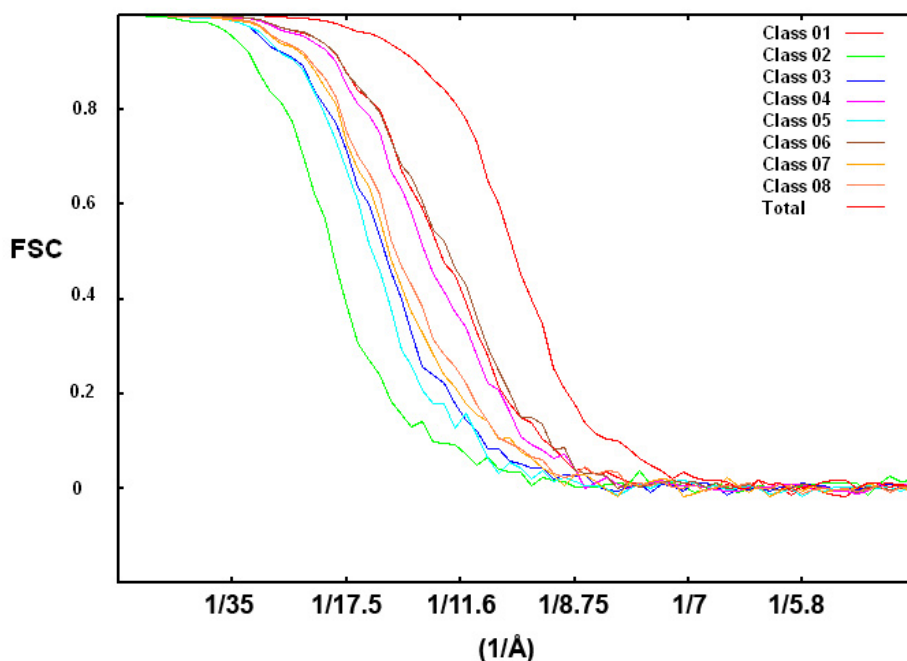

| Class        | Number of particles | FSC 0.143    | FSC 0.5       |
|--------------|---------------------|--------------|---------------|
| Class 01     | 39,143              | 9.8 Å        | 12.4 Å        |
| Class 02     | 6,388               | 13.8 Å       | 18.3 Å        |
| Class 03     | 25,204              | 11.6 Å       | 15.0 Å        |
| Class 04     | 33,458              | 10.1 Å       | 13.0 Å        |
| Class 05     | 15,488              | 12.0 Å       | 15.7 Å        |
| Class 06     | 34,799              | 9.6 Å        | 12.0 Å        |
| Class 07     | 22,231              | 10.7 Å       | 14.8 Å        |
| Class 08     | 28,791              | 10.8 Å       | 14.4 Å        |
| <b>Total</b> | <b>205,502</b>      | <b>8.9 Å</b> | <b>10.1 Å</b> |

**Fig S1** *Resolution curves.* Sorting using maximum likelihood analysis in the program ML3D subdivided the data set into eight subclasses. The resolutions of the maps for each of the classes were estimated using a cutoff of 0.143 in Fourier Shell correlation (FSC)[1]. Also, resolution estimations at cutoff 0.5 in the FSC are shown. The numbers in the appended table also indicate the number of particles assigned to each group by the sorting method.

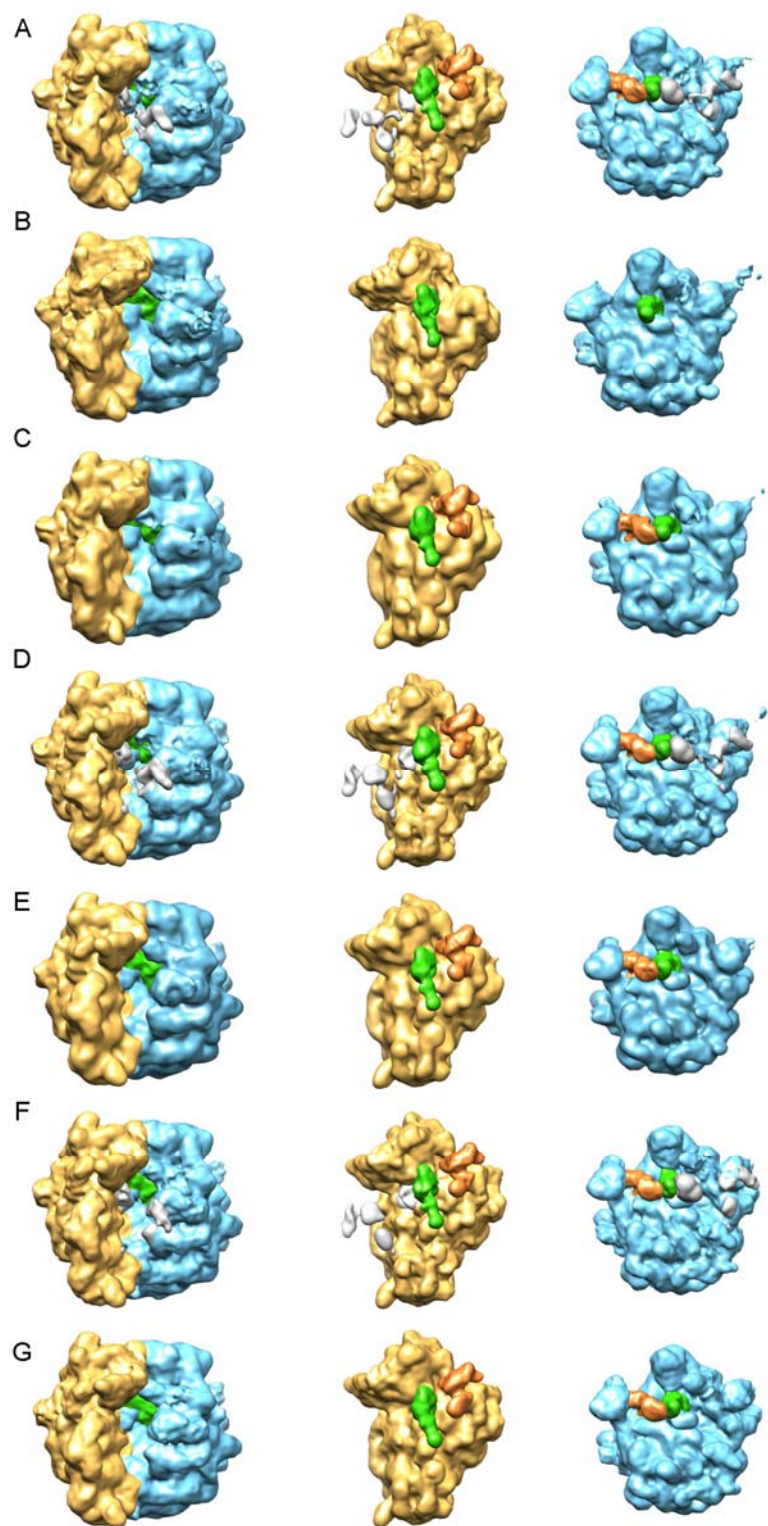

**Fig S2** *Overview of the reconstructions.* A gallery of images is shown for 70S-RelA cryo-EM maps of classes 1 to 7 (A to G). In the renderings 30S subunit (yellow), 50S subunit (blue), and the P- and E-site tRNAs (green and orange, respectively) are shown. Densities (if any) attributable to the deacylated A-site tRNA and RelA are shown in grey.

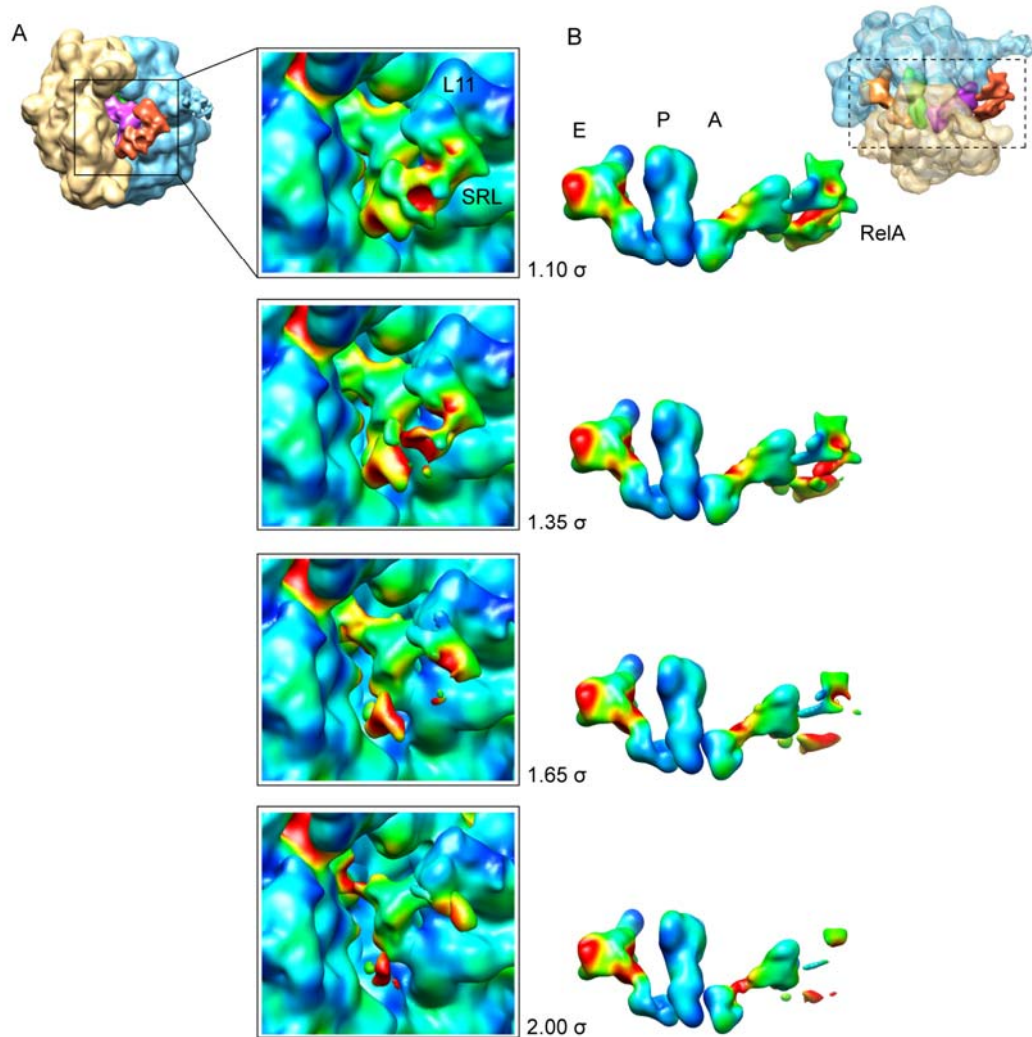

**Fig S3** Analysis of 3D reconstruction densities for 70S-RelA complex after classification. (A, B) Different sets of threshold values (1.1, 1.35, 1.65 and 2.0 $\sigma$ ) are used for comparison. In each panel, the orientation of the complex is shown as a thumbnail. The regions of higher variability are shown in red. Based on the density analysis, it can be concluded that the E- and A/T-tRNAs are the ones that have comparable occupancies, whereas the P-tRNA apparently shows a higher occupancy as judged by the density behavior. Based on the measurement of the average density values of the isolated maps, and the subsequent cross-comparison with other nucleic acid parts of the map, we can estimate that the occupancy of the A/T tRNA is ~70%.

|               |  |   |   |   |   |   |   |   |
|---------------|--|---|---|---|---|---|---|---|
| 70S           |  | - | + | + | + | + | + | + |
| RelA          |  | + | + | + | + | + | + | + |
| mRNA          |  | - | + | + | + | + | + | + |
| P-tRNA(1x)    |  | - | - | + | + | + | + | + |
| A-tRNA(1x)    |  | - | - | - | + | - | - | - |
| A-tRNA(3x)    |  | - | - | - | - | + | - | - |
| NH-A-tRNA(1x) |  | - | - | - | - | - | + | - |
| NH-A-tRNA(3x) |  | - | - | - | - | - | - | + |

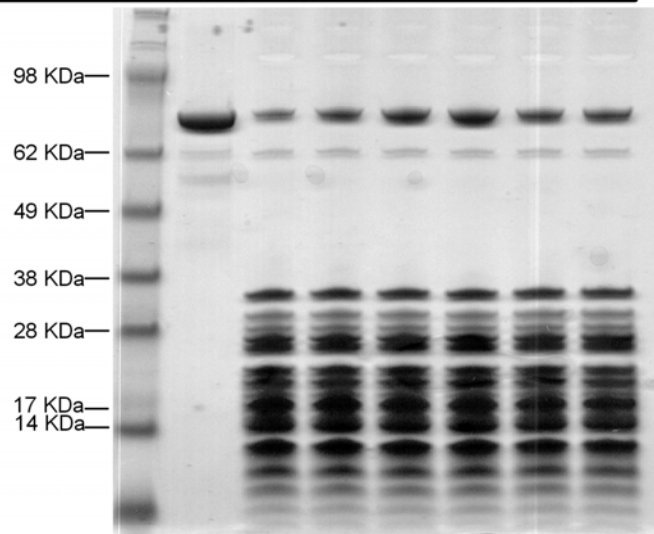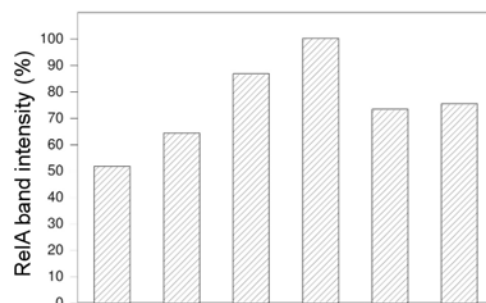

**Fig S4** Binding experiment using non-hydrolyzable *Phe-NH-tRNA<sup>Phe</sup>*. 4-12% SDS-PAGE loaded with the pull-downs of the full-length RelA with different programmed states of the 70S. NH-A-tRNA refers to *Phe-NH-tRNA<sup>Phe</sup>*. The presence of deacylated tRNA promotes the maximum binding of RelA to the ribosome. The observed binding of RelA in the absence of deacylated A-site tRNA is regarded as the initial survey of the ribosome complex by the stringent factor to

sample the A site. It is also possible that the preparations of tRNAs used in the assay contain contamination of deacylated tRNAs that would interfere with the signal.

## **Reference**

1. Rosenthal PB, Henderson R (2003) Optimal determination of particle orientation, absolute hand, and contrast loss in single-particle electron cryomicroscopy. *J Mol Biol* **333**: 721-745
